# Supplementary material
Source: Springer Nature journal article supplement (https://www.springermedizin.de/resource/supplementary/12888_2008_482_MOESM3_ESM.pdf/9483382)

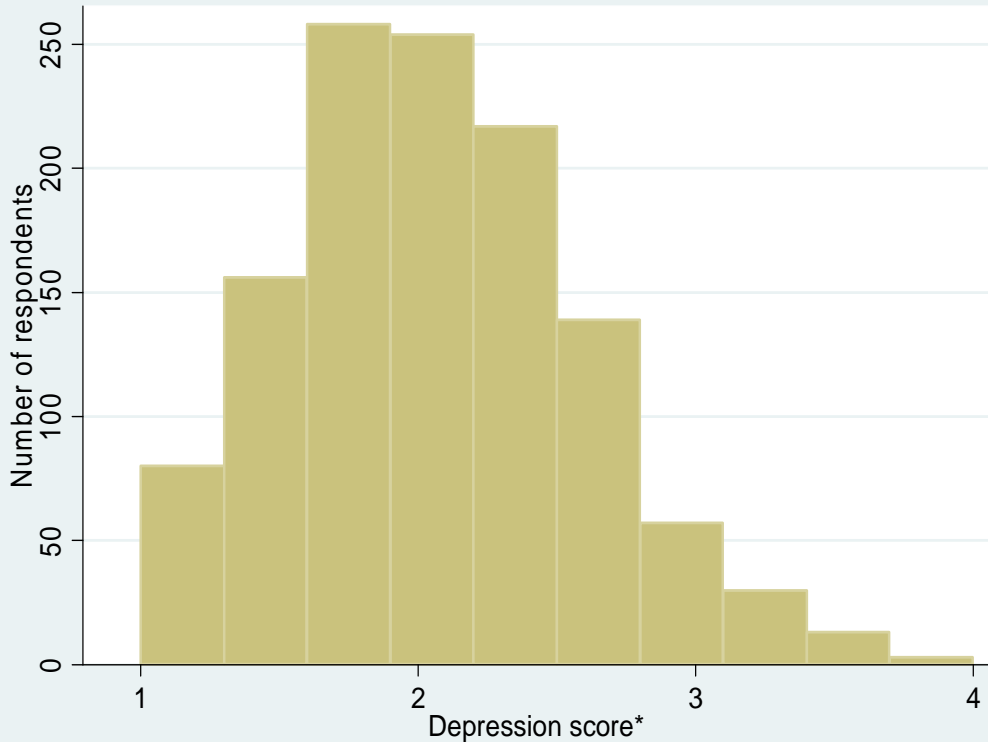

\* Depression cut off 1.75 or above (HSCL-25)

Supplement: MOESM3 [file 9483382]
